# Supplementary material for: A multifunctional nanocatalytic ferroptosis amplifier based on glutathione scavenging and lipid peroxidation amplification for cancer therapy
Source: Royal Society of Chemistry journal article supplement (doi:10.1039/d5tb02642c), 2026-01-01
Supplement: d5tb02642c1.pdf [file d5tb02642c1.pdf]

## Supporting Information

# **A Multifunctional Nanocatalytic Ferroptosis Amplifier Based on Glutathione Scavenging and Lipid Peroxidation Amplification for Cancer Therapy**

Yafei Lin<sup>‡a</sup>, Xue Han<sup>‡a</sup>, Lei Wang<sup>a</sup>, Zhuoran Li<sup>a</sup>, Wenting Zhang<sup>a</sup>, Xuening Zhang<sup>a</sup>,  
Yueyang Yao<sup>a</sup>, Yonghao Gai<sup>\*a</sup>, Xi Zhu<sup>\*b</sup>, Yang Zhang<sup>\*a</sup>

<sup>a</sup>Department of Ultrasound, Shandong Provincial Hospital Affiliated to Shandong  
First Medical University, Jinan, Shandong, 250021, P.R. China. E-mail:

ultra\_gaiyonghao@163.com; wonderfulwater1989@163.com

<sup>b</sup>Institute of Biomedical Engineering, Kunming Medical University, Kunming,  
Yunnan, 650500, P.R. China. E-mail: zhuxi@kmmu.edu.cn

<sup>‡</sup> The authors contribute equally to this article.

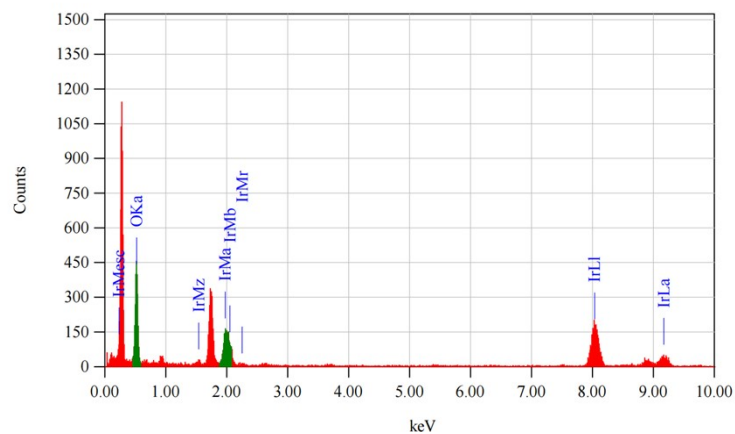

**Fig. S1** EDS of IrO<sub>x</sub> nanoparticles.

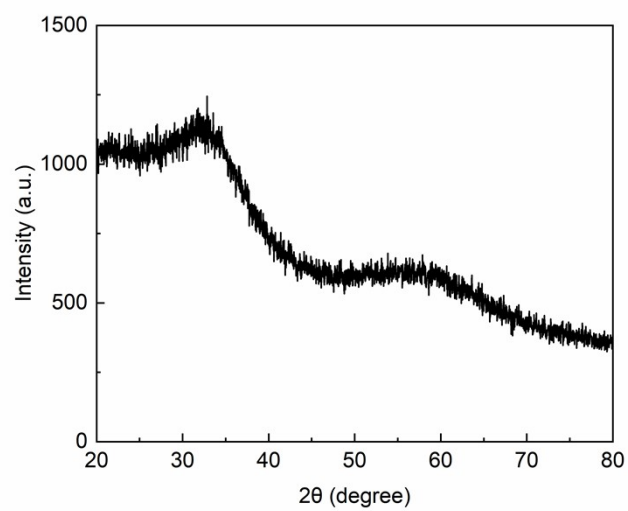

**Fig. S2** XRD spectrum of IrO<sub>x</sub> nanoparticles.

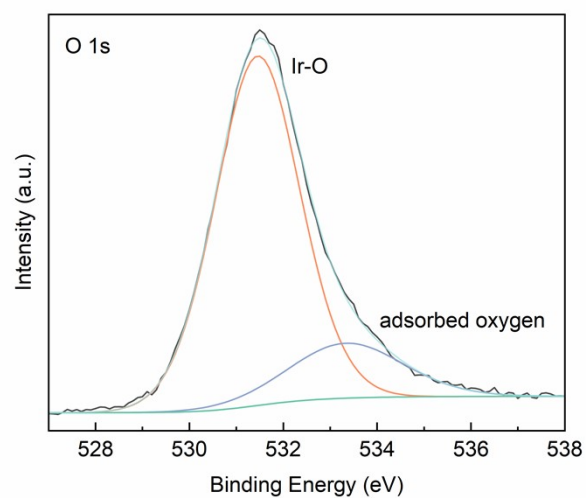

**Fig. S3** O 1s XPS spectrum of the IrO<sub>x</sub> nanoparticles.

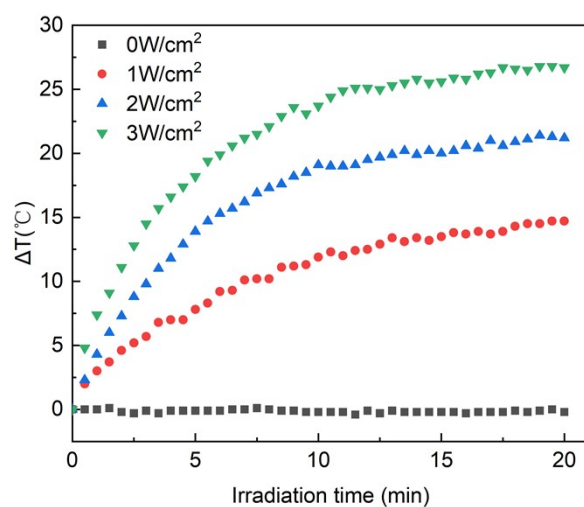

**Fig. S4** The curve shows the temperature change of IrO<sub>x</sub>@HMME-HSA aqueous solutions with a concentration of 100 $\mu$ g/mL over 20 min irradiation of different power densities (0, 1, 2, and 3 W/cm<sup>2</sup>).

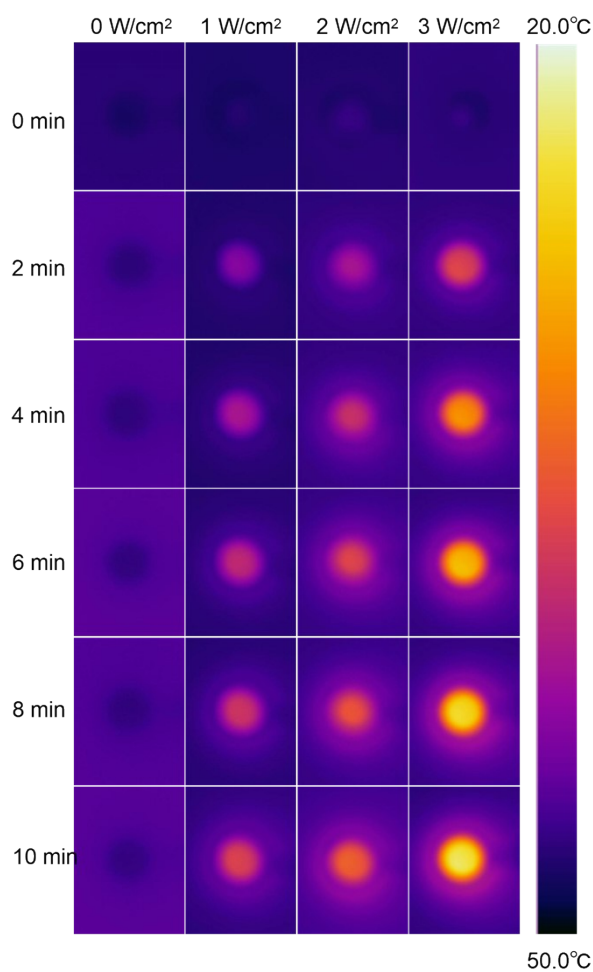

**Fig. S5** Thermal image of the IrO<sub>x</sub>@HMME-HSA aqueous solution under laser irradiation of different power densities (0, 1, 2, and 3 W/cm<sup>2</sup>).

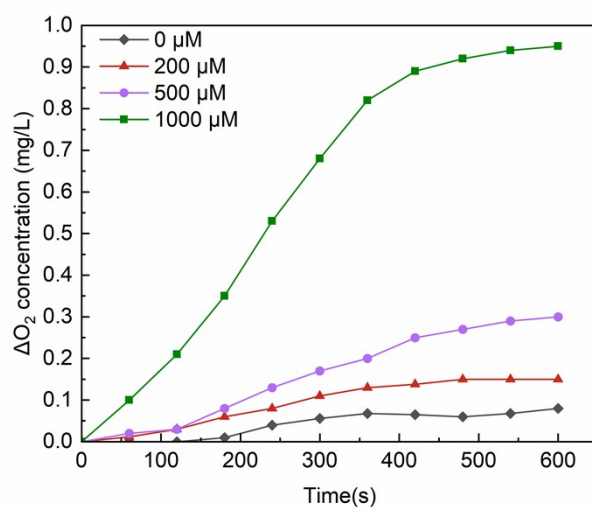

**Fig. S6** The curves show the O<sub>2</sub> production of IrO<sub>x</sub>@HMME-HSA solutions at different concentrations of H<sub>2</sub>O<sub>2</sub> (0, 200, 500, 1000 μM).

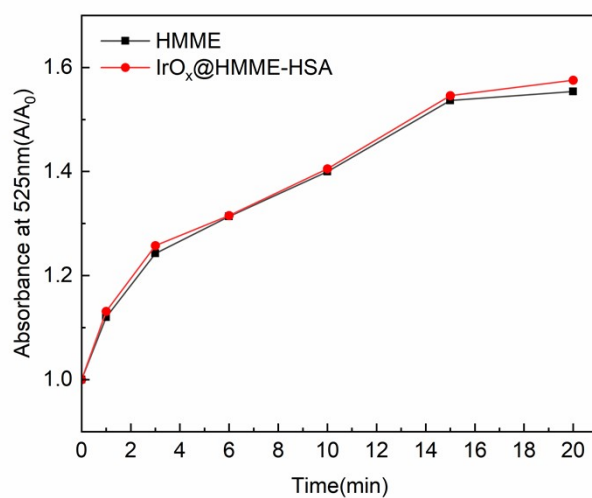

**Fig. S7** Time-dependent generation of singlet oxygen (<sup>1</sup>O<sub>2</sub>) detected using SOSG as a probe. The fluorescence intensity of the reaction product at 525 nm (A/A<sub>0</sub>) was monitored over time for HMME and IrO<sub>x</sub>@HMME-HSA.

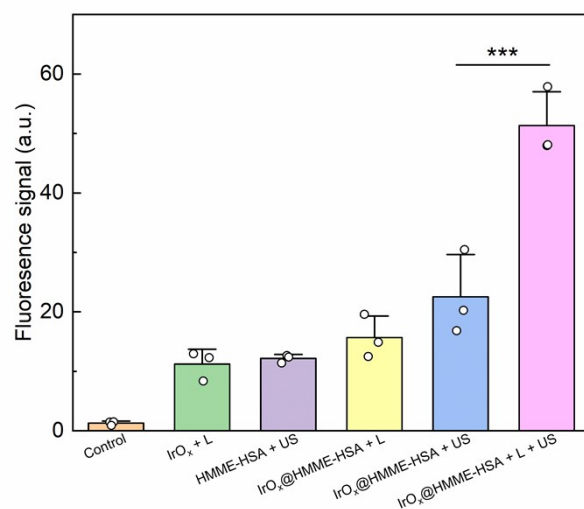

**Fig. S8** Semi-quantitative analysis of ROS-related fluorescence intensity in Fig. S3C by Image J software. Data are presented as the mean  $\pm$  SD ( $n = 3$ ). Significant differences were assessed using t test (\*\*\*)  $p < 0.001$ .

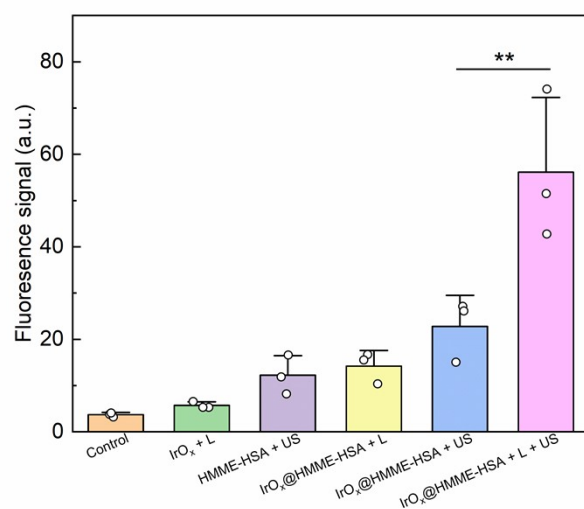

**Fig. S9** Semi-quantitative analysis of LPO fluorescence intensity. Data are represented as mean  $\pm$  SD ( $n = 3$ ; \*\* $p < 0.01$  ).

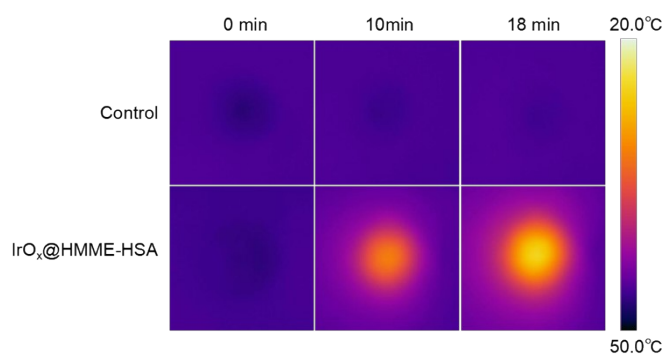

**Fig. S10** Time-course thermal images of the change in solution temperature culture dishes containing PC-3cells subjected to laser irradiation.

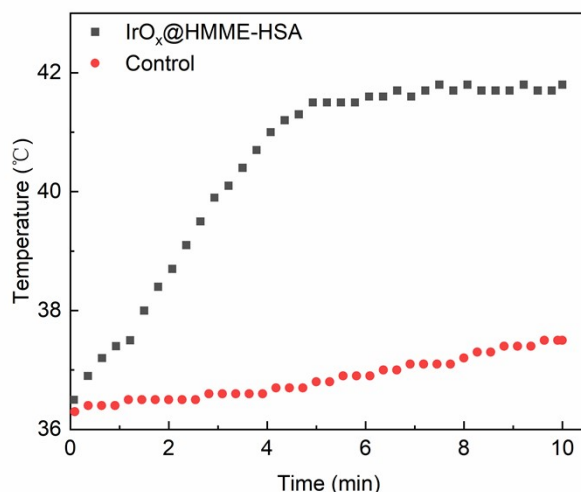

**Fig. S11** Curves shows the temperature change in the body surface of the nude mice under laser irradiation, as recorded using a thermal infrared camera.

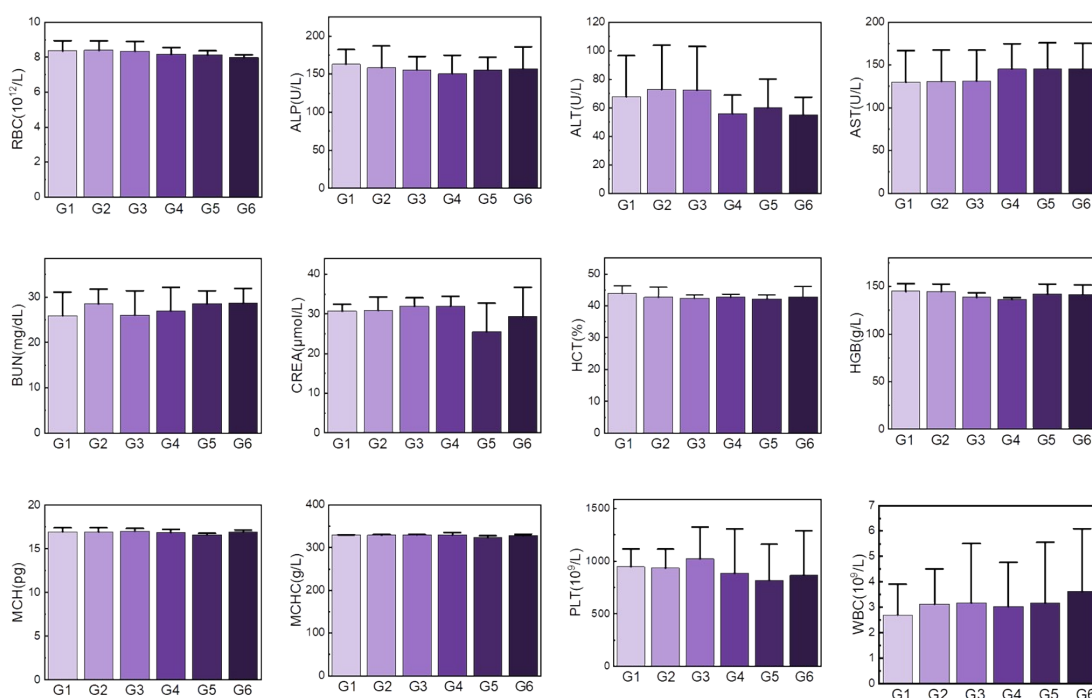

**Fig. S12** Hematological tests, such as regular blood indicators(WBC, PLT, RBC, HCT, MCH, MCHC, HGB,) and functions of liver and kidney (ALT, AST, ALP, CREA, BUN) of different groups (G1: Control, G2: IrO<sub>x</sub> + L, G3: HMME-HSA + US, G4: IrO<sub>x</sub>@HMME-HSA + L, G5: IrO<sub>x</sub>@HMME-HSA + US, G6: IrO<sub>x</sub>@HMME-HSA

+ L + US ) on day 21 after various treatments. The data are expressed as means  $\pm$  SD (n = 3) (\*\* $p$  < 0.001, \*\* $p$  < 0.01, and \* $p$  < 0.05).

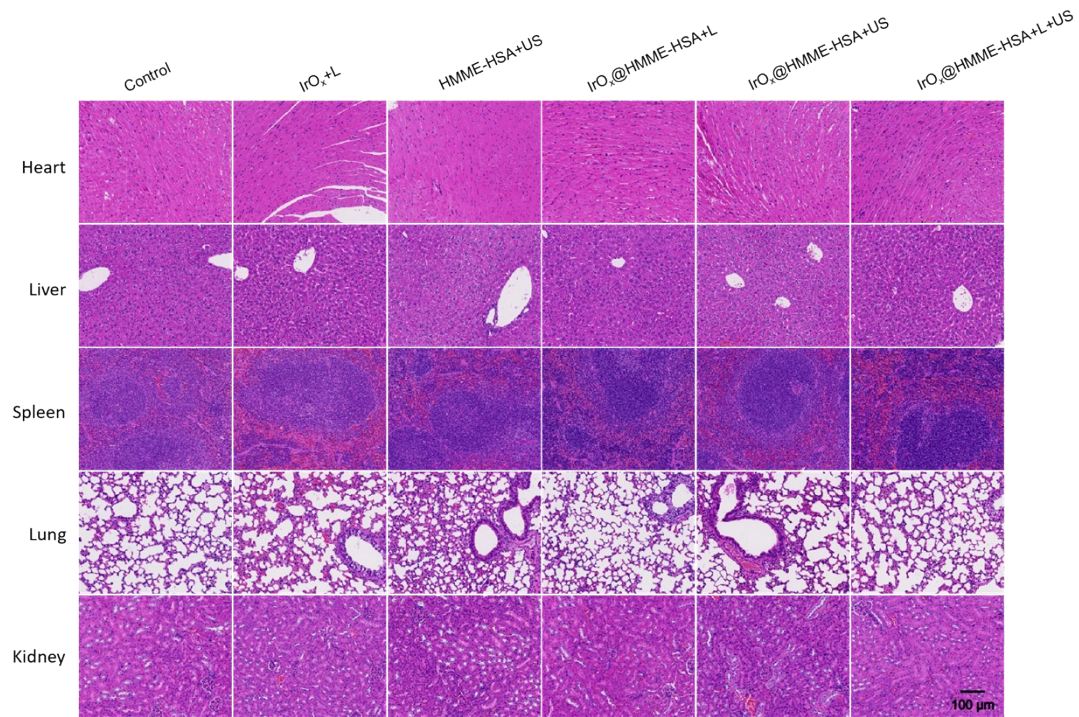

**Fig. S13** Images of H&E-stained sections of the heart, liver, spleen, lung and kidney from mice in each treatment group , scale bar = 100  $\mu$ m.

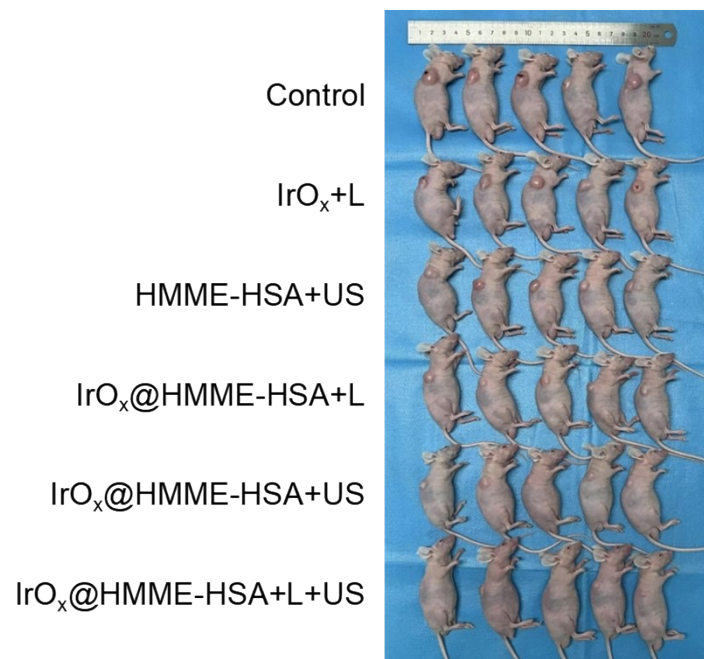



**Fig. S14** Representative images of tumor-bearing nude mice of different groups.

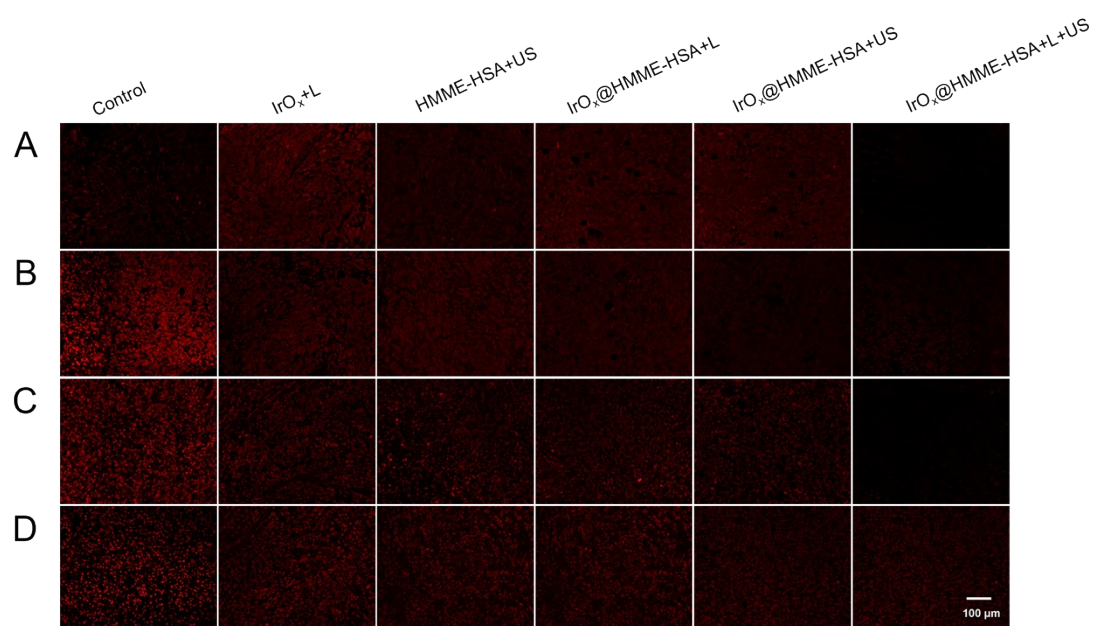

**Fig. S15** Fluorescence images of tumor slices after HSP70 (A), SLC7A11 (B), GCLM (C), and HIF-1 $\alpha$  (D) immunofluorescence staining ,scale bar = 100  $\mu$ m.
